# Supplementary material for: Lignocellulosic bioethanol production employing newly isolated inhibitor and thermotolerant Saccharomyces cerevisiae DBTIOC S24 strain in SSF and SHF
Source: Royal Society of Chemistry journal article supplement (doi:10.1039/c6ra00007j), 2016-01-01
Supplement: c6ra00007j1.pdf [file c6ra00007j1.pdf]

Electronic Annexure

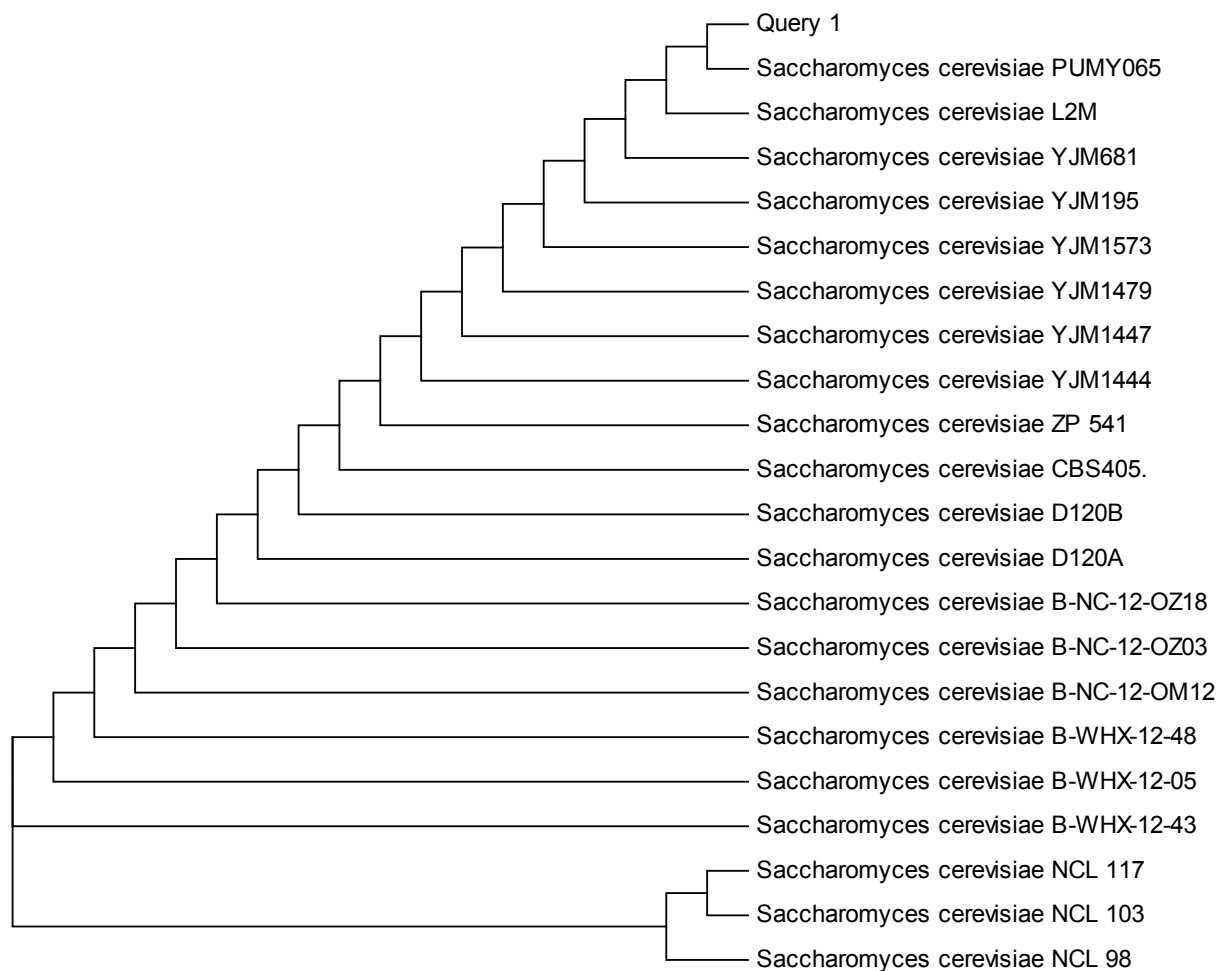

Fig. A.1 Phylogenetic tree of DBTIOC-S24 isolate and type strains of related genera based on 28S rDNA gene sequence comparisons showing the relationship between other neighboring members
